# Supplementary material for: A novel long noncoding RNA AC092718.4 as a prognostic biomarker and promotes lung adenocarcinoma progression
Source: publisher site journal article supplement (doi:10.18632/aging.204426), 2022-12-07
Supplement: Supplementary file [file aging-v14i24-204426-supplementary-material-SD1.pdf]

## SUPPLEMENTARY TABLES

**Supplementary Table 1. The transcript sequence for AC092718.4.**

---

ENSG00000261061 AC092718.4 (715bp)  
GCATGGTGGCTCACGCCTATAATCCCAGCACTTTCAGAGGCCAAGGCAGGTGGGTCAAAGGTCAAGAGTTTGA  
GACTAGCCTTAGCAACATGGTGAAGGTGAACCCCGACTCTACTAAAAATACAAAAATTAGCTGGGCCTGGTGGT  
GTGCACCTGTAATCCCAGCTACTTAGGAGGCTGAGGCAGGAGAATCGCTTGAACCCGGGAGACATAGGTTGCA  
GTGAGCCGAGACTGCACCACTGCACTCCAGCCTAGGTGACAGAGTGAGACTCCATCTTAAAAAATAAATAAATA  
AAATAAAATAAATGACATCACTTTGGTTCAGAGCTCTAAAATGGAGGGAGGAAGCCATTCTAAAAAGGACTCCC  
TACATGACCTGCAACTTGAAAAAAAAATTTAAAGCTCCAAAAAAAAAAAAACAATACAGGAGCTTACCTTGAACCTT  
TGAATTGGGCCAAATTGCGATGACCACTGCATCCTGGAAAATTTATTTTACCAGCACTACAACCTCCTCAACAGC  
ACCAACCAATAAACTATGGATTTTTGTACTAAGCCAGTTGCCTCTTTCAAACAACCTTGCAACTTGTCTAATCA  
CCCTCAGCTTTTTTTAAAAACCCCTCCTCTACCCTCTCTTTCAGAACACAAGTGGCTTCTAGCTGAATCTGTCT  
CCCAAATTGCAATTCCTAAGACCTCAATAAAAACACCTTGTCTTGCTGC

---

**Supplementary Table 2. The top 107 genes that positively correlated with AC092718.4 in LUAD.**

|            | <b>Statistic</b> | <b>P-value</b> | <b>FDR (BH)</b> | <b>Event_SD</b> | <b>Event_TD</b> |
|------------|------------------|----------------|-----------------|-----------------|-----------------|
| AC092718.4 | 1                | 1.00E-72       | 1.00E-68        | 515             | 515             |
| IL4I1      | 0.682938         | 5.51E-72       | 5.51E-68        | 515             | 515             |
| SLC2A5     | 0.680273         | 3.15E-71       | 2.10E-67        | 515             | 515             |
| HAPLN3     | 0.65549          | 1.50E-64       | 7.49E-61        | 515             | 515             |
| SLAMF8     | 0.634391         | 2.41E-59       | 9.65E-56        | 515             | 515             |
| GPR84      | 0.632292         | 7.56E-59       | 2.52E-55        | 515             | 514             |
| CTSK       | 0.631386         | 1.24E-58       | 3.53E-55        | 515             | 515             |
| MSC        | 0.622449         | 1.43E-56       | 3.56E-53        | 515             | 515             |
| PLEKHO1    | 0.620671         | 3.60E-56       | 8.00E-53        | 515             | 515             |
| IL21R      | 0.617674         | 1.70E-55       | 3.39E-52        | 515             | 515             |
| LILRB4     | 0.617001         | 2.40E-55       | 4.35E-52        | 515             | 515             |
| ADAM19     | 0.602785         | 2.92E-52       | 4.87E-49        | 515             | 515             |
| ALPK2      | 0.598238         | 2.63E-51       | 4.05E-48        | 515             | 511             |
| OLFML2B    | 0.590144         | 1.21E-49       | 1.73E-46        | 515             | 515             |
| ADAM12     | 0.589252         | 1.83E-49       | 2.44E-46        | 515             | 515             |
| NCF1       | 0.583442         | 2.65E-48       | 3.31E-45        | 515             | 515             |
| CYTH4      | 0.579647         | 1.48E-47       | 1.74E-44        | 515             | 515             |
| COL6A2     | 0.57525          | 1.05E-46       | 1.17E-43        | 515             | 515             |
| KIAA1949   | 0.574579         | 1.41E-46       | 1.49E-43        | 515             | 515             |
| FERMT3     | 0.57402          | 1.81E-46       | 1.73E-43        | 515             | 515             |
| LILRB2     | 0.574016         | 1.81E-46       | 1.73E-43        | 515             | 515             |
| VCAM1      | 0.572478         | 3.56E-46       | 3.24E-43        | 515             | 515             |
| SLC2A6     | 0.570835         | 7.31E-46       | 6.36E-43        | 515             | 515             |
| ARID5A     | 0.570667         | 7.87E-46       | 6.55E-43        | 515             | 515             |
| WIPF1      | 0.570233         | 9.51E-46       | 7.52E-43        | 515             | 515             |
| TNFRSF9    | 0.570166         | 9.78E-46       | 7.52E-43        | 515             | 513             |
| MMP12      | 0.569378         | 1.38E-45       | 1.02E-42        | 515             | 515             |
| PTPN7      | 0.569167         | 1.51E-45       | 1.08E-42        | 515             | 515             |
| SPHK1      | 0.567503         | 3.10E-45       | 2.14E-42        | 515             | 515             |
| ADAMDEC1   | 0.567134         | 3.64E-45       | 2.42E-42        | 515             | 514             |
| JAK3       | 0.563413         | 1.79E-44       | 1.15E-41        | 515             | 515             |
| FOXP3      | 0.561873         | 3.43E-44       | 2.14E-41        | 515             | 515             |
| CD14       | 0.560314         | 6.63E-44       | 4.02E-41        | 515             | 515             |
| TNFRSF4    | 0.559875         | 7.97E-44       | 4.69E-41        | 515             | 515             |
| LAPTM5     | 0.559407         | 9.70E-44       | 5.54E-41        | 515             | 515             |
| EMILIN1    | 0.557408         | 2.24E-43       | 1.24E-40        | 515             | 515             |
| THY1       | 0.556211         | 3.68E-43       | 1.99E-40        | 515             | 515             |
| LILRB1     | 0.553845         | 9.79E-43       | 5.15E-40        | 515             | 515             |
| DOK3       | 0.55144          | 2.62E-42       | 1.34E-39        | 515             | 515             |
| WAS        | 0.551342         | 2.73E-42       | 1.36E-39        | 515             | 515             |
| TMEM158    | 0.549269         | 6.34E-42       | 3.09E-39        | 515             | 515             |
| CPXM1      | 0.547959         | 1.08E-41       | 5.13E-39        | 515             | 515             |
| ITGAX      | 0.547707         | 1.19E-41       | 5.54E-39        | 515             | 515             |
| LSP1       | 0.546824         | 1.70E-41       | 7.73E-39        | 515             | 515             |
| MAFB       | 0.545333         | 3.09E-41       | 1.37E-38        | 515             | 515             |
| MMP14      | 0.545167         | 3.31E-41       | 1.44E-38        | 515             | 515             |
| LRRC15     | 0.543262         | 7.07E-41       | 3.00E-38        | 515             | 515             |
| COL6A1     | 0.542579         | 9.26E-41       | 3.86E-38        | 515             | 515             |
| LRRC25     | 0.541096         | 1.67E-40       | 6.79E-38        | 515             | 515             |
| RELT       | 0.539614         | 2.98E-40       | 1.19E-37        | 515             | 515             |
| PSTPIP1    | 0.538337         | 4.92E-40       | 1.93E-37        | 515             | 515             |
| MCHR1      | 0.537322         | 7.30E-40       | 2.81E-37        | 515             | 509             |
| SIGLEC10   | 0.53491          | 1.86E-39       | 7.02E-37        | 515             | 515             |
| EMP3       | 0.534235         | 2.42E-39       | 8.94E-37        | 515             | 515             |
| TWIST1     | 0.533344         | 3.40E-39       | 1.24E-36        | 515             | 511             |
| COL6A3     | 0.533166         | 3.64E-39       | 1.30E-36        | 515             | 515             |

|          |          |          |          |     |     |
|----------|----------|----------|----------|-----|-----|
| PLEKHO2  | 0.532694 | 4.37E-39 | 1.53E-36 | 515 | 515 |
| FCGR2B   | 0.530994 | 8.36E-39 | 2.88E-36 | 515 | 515 |
| PRRX1    | 0.530786 | 9.05E-39 | 3.07E-36 | 515 | 515 |
| ITGB7    | 0.530413 | 1.04E-38 | 3.48E-36 | 515 | 515 |
| TNFAIP6  | 0.528236 | 2.38E-38 | 7.80E-36 | 515 | 515 |
| CD53     | 0.527246 | 3.46E-38 | 1.12E-35 | 515 | 515 |
| NCF1B    | 0.525056 | 7.87E-38 | 2.50E-35 | 515 | 514 |
| MXRA5    | 0.524463 | 9.82E-38 | 3.06E-35 | 515 | 515 |
| NCF1C    | 0.524429 | 9.94E-38 | 3.06E-35 | 515 | 515 |
| LOXL3    | 0.521806 | 2.63E-37 | 7.98E-35 | 515 | 515 |
| COL1A1   | 0.521619 | 2.82E-37 | 8.23E-35 | 515 | 515 |
| TMEM90B  | 0.521609 | 2.83E-37 | 8.23E-35 | 515 | 515 |
| SULF2    | 0.521602 | 2.84E-37 | 8.23E-35 | 515 | 515 |
| FCGR1C   | 0.520892 | 3.69E-37 | 1.05E-34 | 515 | 515 |
| FCER1G   | 0.520536 | 4.21E-37 | 1.18E-34 | 515 | 515 |
| GFPT2    | 0.519781 | 5.55E-37 | 1.54E-34 | 515 | 515 |
| CLEC4E   | 0.518879 | 7.73E-37 | 2.12E-34 | 515 | 513 |
| PDCD1LG2 | 0.518729 | 8.17E-37 | 2.20E-34 | 515 | 515 |
| IL10RA   | 0.518706 | 8.24E-37 | 2.20E-34 | 515 | 515 |
| GBP5     | 0.518026 | 1.06E-36 | 2.78E-34 | 515 | 515 |
| CD86     | 0.517779 | 1.16E-36 | 3.00E-34 | 515 | 515 |
| HS3ST3A1 | 0.517699 | 1.19E-36 | 3.05E-34 | 515 | 513 |
| FCGR2C   | 0.517422 | 1.32E-36 | 3.33E-34 | 515 | 515 |
| SPI1     | 0.516703 | 1.71E-36 | 4.27E-34 | 515 | 515 |
| CILP     | 0.516548 | 1.81E-36 | 4.46E-34 | 515 | 515 |
| FCGR1B   | 0.516153 | 2.09E-36 | 5.09E-34 | 515 | 515 |
| TNFRSF8  | 0.515472 | 2.67E-36 | 6.44E-34 | 515 | 515 |
| GREM1    | 0.51523  | 2.92E-36 | 6.94E-34 | 515 | 514 |
| ISLR     | 0.514163 | 4.29E-36 | 1.01E-33 | 515 | 515 |
| LCP2     | 0.513658 | 5.14E-36 | 1.20E-33 | 515 | 515 |
| SIRPA    | 0.513116 | 6.25E-36 | 1.44E-33 | 515 | 515 |
| NETO1    | 0.512802 | 7.00E-36 | 1.58E-33 | 515 | 466 |
| COL3A1   | 0.512794 | 7.02E-36 | 1.58E-33 | 515 | 515 |
| MEIS3    | 0.512753 | 7.12E-36 | 1.58E-33 | 515 | 515 |
| IL12RB1  | 0.511935 | 9.55E-36 | 2.10E-33 | 515 | 515 |
| RELB     | 0.511234 | 1.23E-35 | 2.66E-33 | 515 | 515 |
| C13orf18 | 0.511067 | 1.30E-35 | 2.80E-33 | 515 | 515 |
| FCGR1A   | 0.510504 | 1.59E-35 | 3.38E-33 | 515 | 515 |
| CALHM2   | 0.509756 | 2.08E-35 | 4.37E-33 | 515 | 515 |
| PCOLCE   | 0.507993 | 3.88E-35 | 8.07E-33 | 515 | 515 |
| HCST     | 0.506634 | 6.26E-35 | 1.29E-32 | 515 | 515 |
| CORO1A   | 0.506029 | 7.74E-35 | 1.58E-32 | 515 | 515 |
| HAVCR2   | 0.504383 | 1.38E-34 | 2.78E-32 | 515 | 515 |
| MYO1F    | 0.503928 | 1.61E-34 | 3.23E-32 | 515 | 515 |
| WISP1    | 0.503835 | 1.67E-34 | 3.30E-32 | 515 | 515 |
| NFAM1    | 0.503793 | 1.69E-34 | 3.31E-32 | 515 | 515 |
| KCNK13   | 0.503684 | 1.76E-34 | 3.41E-32 | 515 | 514 |
| THBS2    | 0.502531 | 2.62E-34 | 5.04E-32 | 515 | 515 |
| ANGPTL2  | 0.502462 | 2.69E-34 | 5.11E-32 | 515 | 515 |
| CCL4     | 0.502101 | 3.04E-34 | 5.74E-32 | 515 | 515 |
| MATK     | 0.500151 | 5.97E-34 | 1.11E-31 | 515 | 515 |
